# Supplementary material
Source: PubMed Central journal article supplement (PMC4140280)
Supplement: supp_M114.569087_jbc.M114.569087-1.pdf [file supp_M114.569087_jbc.M114.569087-1.pdf]

## Mouse myosin-19 is a plus-end-directed, high-duty molecular motor

Zekuan Lu<sup>1</sup>, Xiao-Nan Ma<sup>1</sup>, Hai-Man Zhang<sup>1</sup>, Huan-Hong Ji<sup>1</sup>, Hao Ding<sup>1</sup>, Jie Zhang<sup>1</sup>, Dan Luo<sup>1</sup>, Yujie Sun<sup>2</sup>, and Xiang-dong Li<sup>1,\*</sup>

<sup>1</sup>Group of cell motility and muscle contraction, Institute of Zoology, Chinese Academy of Sciences, Beijing 100101, China;

<sup>2</sup>Biodynamic Optical Imaging Center (BIOPIC), School of Life Sciences, Peking University, Beijing 100871, China.

### Legend for Supplemental Movies

**Movie S1.** Actin filaments translocated by M19-1IQ-Avi. Actin filaments were labeled with Rhodamine phalloidin. The assay conditions were 25 mM Imidazole (pH7.5), 100 mM KCl, 5 mM MgCl<sub>2</sub>, 1 mM EGTA, 100 mM β-mercaptethanol, 2.5 mg/ml glucose, 2 U/μl catalase, 40 U/ml glucose oxidase, 0.5% Methyl cellulose, 6 μM RLC9, 6 μM RLC12b, and 2 mM ATP at room temperature (about 25°C). The movement of F-actin was recorded under an Olympus IX71 inverted fluorescent microscope. Frame rates: 3 s<sup>-1</sup>. Play rate: 12 s<sup>-1</sup>. Frame width is 100 μm.

**Movie S2.** Actin filaments translocated by M19-2IQ-Avi. Actin filaments were labeled with Rhodamine phalloidin. The assay conditions were the same as Movie S1. Frame rates: 3 s<sup>-1</sup>. Play rate: 12 s<sup>-1</sup>. Frame width is 100 μm.

**Movie S3.** Actin filaments translocated by M19-3IQ-Avi. Actin filaments were labeled with Rhodamine phalloidin. The assay conditions were the same as Movie S1. Frame rates: 3 s<sup>-1</sup>. Play rate: 12 s<sup>-1</sup>. Frame width is 100 μm.

**Movie S4.** Actin filaments translocated by Myo5a-ΔT. Actin filaments were labeled with Rhodamine phalloidin. The assay conditions were the same as Movie S1, except that 6 μM RLC9 and 6 μM RLC12b were replaced with 12 μM CaM. Frame rates: 1 s<sup>-1</sup>. Play rate: 12 s<sup>-1</sup>. Frame width is 100 μm.
